# Supplementary material for: An Open-Label Trial of 12-Week Simeprevir plus Peginterferon/Ribavirin (PR) in Treatment-Naïve Patients with Hepatitis C Virus (HCV) Genotype 1 (GT1)
Source: PLoS One. 2016 Jul 18;11(7):e0158526. doi: 10.1371/journal.pone.0158526 (PMC4948848; doi:10.1371/journal.pone.0158526)
Supplement: S1 Dataset — (ZIP) [file pone.0158526.s009.zip]

Archive with 47 entries (47 files):
- LVIBL01.rtf
- Minimal Data Set for PONE-D-15-55518 - Table of Contents.xlsx
- TEFSUB01.rtf
- TEFSUB01A.RTF
- TEFSUB02 - Merged Detectable.rtf
- TEFSUB02.rtf
- TEFSVR02aB.RTF
- TEFSVR03.rtf
- TEFSVR03A.RTF
- TEFSVR08_4.rtf
- TEFSVR08_12.rtf
- TEFVBT01.rtf
- TEFVF01.rtf
- TSIDEM01A.RTF
- TSIDEM01B.RTF
- TSIDEM02.rtf
- TSIDS01.rtf
- TSIDS05A.RTF
- TSIDS05B.RTF
- TVIBL07.rtf
- TVIBL09.rtf
- TVIFAI05A.RTF
- Patient-reported Outcomes/TPROCED03.rtf
- Patient-reported Outcomes/TPROEQ04.rtf
- Patient-reported Outcomes/TPROEQ10.rtf
- Patient-reported Outcomes/TPROFSS03.rtf
- Patient-reported Outcomes/TPROWP03.rtf
- Patient-reported Outcomes/TPROWP03A.rtf
- Regression analyses/QCTEFSVR12MLRLRUM.RTF
- Regression analyses/QCTEFSVR12MLRnonCCLRUM.RTF
- Regression analyses/QCTEFVRLMLRLRUM.RTF
- Regression analyses/QCTEFVRLMLRnonCCLRUM.RTF
- Safety data/tsfae01tdg112.rtf
- Safety data/tsfae01tdg1all.rtf
- Safety data/tsfae01tdg1gt12.rtf
- Safety data/tsfae02tdg112.rtf
- Safety data/tsfae02tdg1all.rtf
- Safety data/tsfae02tdg1gt12.rtf
- Safety data/tsfae05tdg112.rtf
- Safety data/tsfae05tdg1all.rtf
- Safety data/tsfae05tdg1gt12.rtf
- Safety data/tsfae15tdg112.rtf
- Safety data/tsfae15tdg1all.rtf
- Safety data/tsfae15tdg1gt12.rtf
- Safety data/TSFLAB01-GT.rtf
- Safety data/TSFLAB02-GT.rtf
- LSIDEM02.rtf
