# Supplementary material for: An Open-Label Trial of 12-Week Simeprevir plus Peginterferon/Ribavirin (PR) in Treatment-Naïve Patients with Hepatitis C Virus (HCV) Genotype 1 (GT1)
Source: PLoS One. 2016 Jul 18;11(7):e0158526. doi: 10.1371/journal.pone.0158526 (PMC4948848; doi:10.1371/journal.pone.0158526)
Supplement: S1 Dataset — (ZIP) [file pone.0158526.s009.zip › Minimal Data Set for PONE-D-15-55518 - Table of Contents.xlsx]

## Sheet: Sheet1
Minimal Data Set for PONE-D-15-55518 - Table of Contents
Filename	Description
Efficacy
TSIDS05A	Completions and Discontinuations of Study Medication and Reasons for Discontinuation; Intent-to-treat
TSIDS05B	Completions and Discontinuations of the Trial and Reasons for Discontinuation; Intent-to-treat
TSIDEM01A	Demographic Characteristics; Intent-to-treat
TSIDEM01B	Demographic Characteristics by Subgroups of Interest; Intent-to-treat
TVIBL09	Number (%) of Subjects by Baseline Polymorphism at NS3 Positions 43, 80, 122, 155, 156 and 168; Intent-to-treat
TVIFAI05A	Number (%) of Subjects with Emerging Mutations (NS3 Positions 36,41,43,54,55,80,107,122,132,138,155,156,158,168,169,170,174,175) in Subjects with Failure - at Time of Failure - by Baseline Q80K Polymorphism; Intent-to-treat
TEFSUB01	Sustained Virologic Response 12 Weeks After the Planned End of Treatment (SVR12) - by Stratification Factors; Intent-to-treat
TEFSUB02	Sustained Virologic Response 12 Weeks After the Planned End of Treatment - Subgroup Analyses for Early Response Parameters. Intent-to-treat
TEFSUB02 - Merged Detectable	As TEFSUB02 - Non-undetectable SVR12 groups merged, as displayed in Figure 3 (rightmost category)
TEFSVR02aB	Sustained Virologic Response 4 and 24 Weeks After the Planned End of Treatment (SVR4 and SVR24); Intent-to-treat
TEFSVR03	Sustained Virologic Response, 4, 12 and 24 Weeks After the Planned End of Treatment - Details; Intent-to-treat
TEFSVR03A	Reasons for not Achieving Sustained Virologic Response 12 Weeks After the Planned End of Treatment (SVR12); Intent-to-treat
TEFSVR08_4	Sustained Virologic Response 4 Weeks After the Planned End of Treatment; Genotype 1 (with 95% CIs)
TEFSVR08_12	Sustained Virologic Response 12 Weeks After the Planned End of Treatment; Genotype 1
TEFVF01	On-Treatment and Post-Treatment Failure; Intent-to-treat
TEFVBT01	Viral Breakthrough; Intent-to-treat
TEFSUB01	Sustained Virologic Response 12 Weeks After the Planned End of Treatment - Subgroup Analyses; Intent-to-treat
TSIDEM02	Baseline Disease Characteristics; Intent-to-treat
TSIDS01	Subjects Screened and Treated; All Subjects
TVIBL07	Number (%) of Subjects with Baseline Q80K Polymorphism; Intent-to-treat
LSIDEM02	Listing of Baseline Disease Characteristics; Intent-to-treat
LSIVIBL01	Listing of Baseline Polymorphisms; Intent-to-treat
Safety
TSFAE01TDG1ALL	Adverse Event Summary Table; Intent-to-treat (all patients)
TSFAE01TDG1GT12	Adverse Event Summary Table; Intent-to-treat (>12-week group)
TSFAE01TDG112	Adverse Event Summary Table; Intent-to-treat (12-week group)
TSFAE02TDG1ALL	Number (%) of Patients with Adverse Events, Intent-to-treat (all patients)
TSFAE02TDG1GT12	Number (%) of Patients with Adverse Events, Intent-to-treat (>12-week group)
TSFAE02TDG112	Number (%) of Patients with Adverse Events, Intent-to-treat (12-week group)
TSFAE05TDG1ALL	Number (%) of Patients with Adverse Events by Worst WHO Toxicity Grade, Intent-to-treat (all patients)
TSFAE05TDG1GT12	Number (%) of Patients with Adverse Events by Worst WHO Toxicity Grade, Intent-to-treat (>12-week group)
TSFAE05TDG112	Number (%) of Patients with Adverse Events by Worst WHO Toxicity Grade, Intent-to-treat (12-week group)
TSFAE15TDG1ALL	Number (%) of Patients with Adverse Events of Special/Clinical Interest by Preferred Term (all patients)
TSFAE15TDG1GT12	Number (%) of Patients with Adverse Events of Special/Clinical Interest by Preferred Term (>12-week group)
TSFAE15TDG112	Number (%) of Patients with Adverse Events of Special/Clinical Interest by Preferred Term (12-week group)
TSFLAB01-GT	Actual Laboratory Parameters values by Analysis Timepoint (Entire Treatment Phase); Intent-to-treat
TSFLAB02-GT	Change from Baseline in Laboratory Parameters by Analysis Timepoint (Entire Treatment Phase); Intent-to-treat
Multivariate Analysis
QCTEFSVR12MLRLRUM	Multivariate Logistic Regression; Outcome=SVR12 (12-week group)
QCTEFSVR12MLRnonCCLRUM	Multivariate Logistic Regression; Outcome=SVR12 (12-week group; IL28B non-CC genotype only)
QCTEFVRLMLRLRUM	Multivariate Logistic Regression; Outcome=Viral Relapse (12-week group)
QCTEFVRLMLRnonCCLRUM	Multivariate Logistic Regression; Outcome=Viral Relapse (12-week group; IL28B non-CC genotype only)
Patient-reported Outcomes
TPROCED03	Descriptive Statistics of the Changes from Baseline in the CES-D Depression Score per Analysis Timepoint - Available Data Approach(;) Intent-to-Treat
TPROEQ04	Descriptive Statistics of the Changes in the EQ-5D Visual Analogue Scale (VAS) per Analysis Timepoint - Available Data Approach(;) Intent-to-Treat
TPROEQ10	Descriptive Statistics of the Changes in the EQ-5D Valuation Index per Analysis Timepoint; Intent-to-Treat
TPROFSS03	Descriptive Statistics of the Changes from Baseline in the Total Fatigue Severity Score per Analysis Timepoint - Available Data Approach(;) Intent-to-Treat
TPROWP03	Descriptive Statistics of the Change from Baseline in WPAI Scores per Analysis Timepoint – Available Data Approach; Intent-to-Treat
TPROWP03A	Descriptive Statistics of the Change from Baseline in WPAI Daily Activities Impairment Score per Analysis Timepoint – Available Data Approach; Intent-to-Treat
